# Supplementary material for: Solid phase extraction of Pb(ii) and Cd(ii) ions based on murexide functionalized magnetic nanoparticles with the aid of experimental design methodology
Source: Royal Society of Chemistry journal article supplement (doi:10.1039/c5ay02362a), 2015-01-01
Supplement: c5ay02362a1.pdf [file c5ay02362a1.pdf]

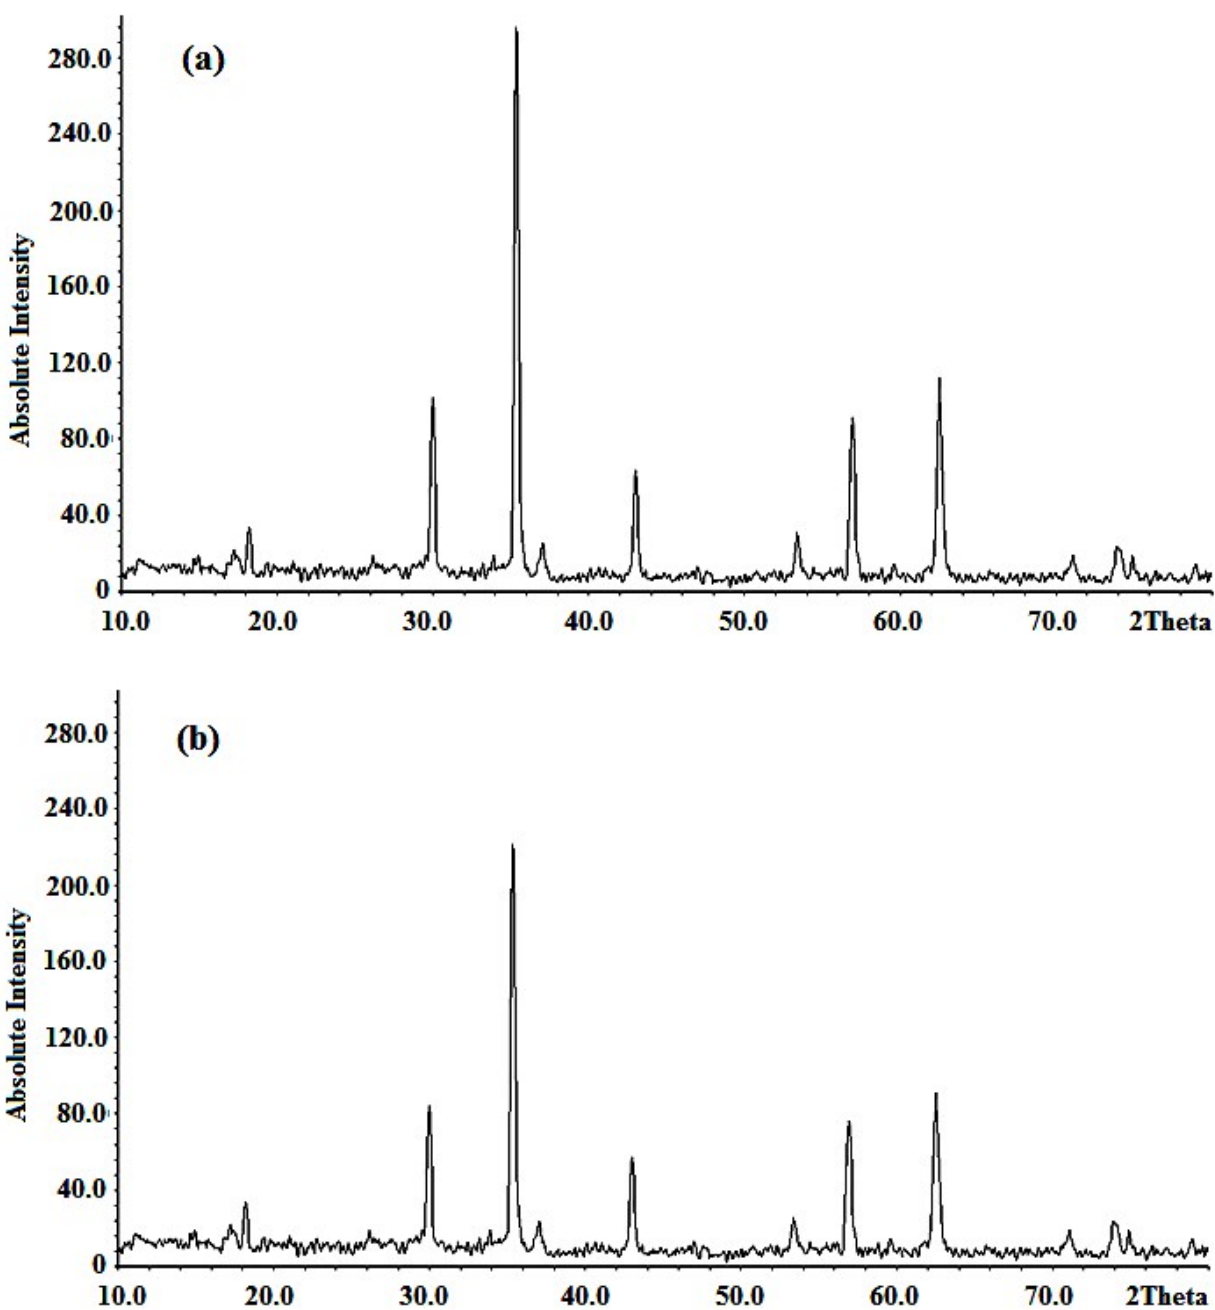

**Fig. 1S:** The High-angle X-ray diffraction pattern of (a) Fe<sub>3</sub>O<sub>4</sub> NPs and (b) Fe<sub>3</sub>O<sub>4</sub>-Mu nanosorbent.

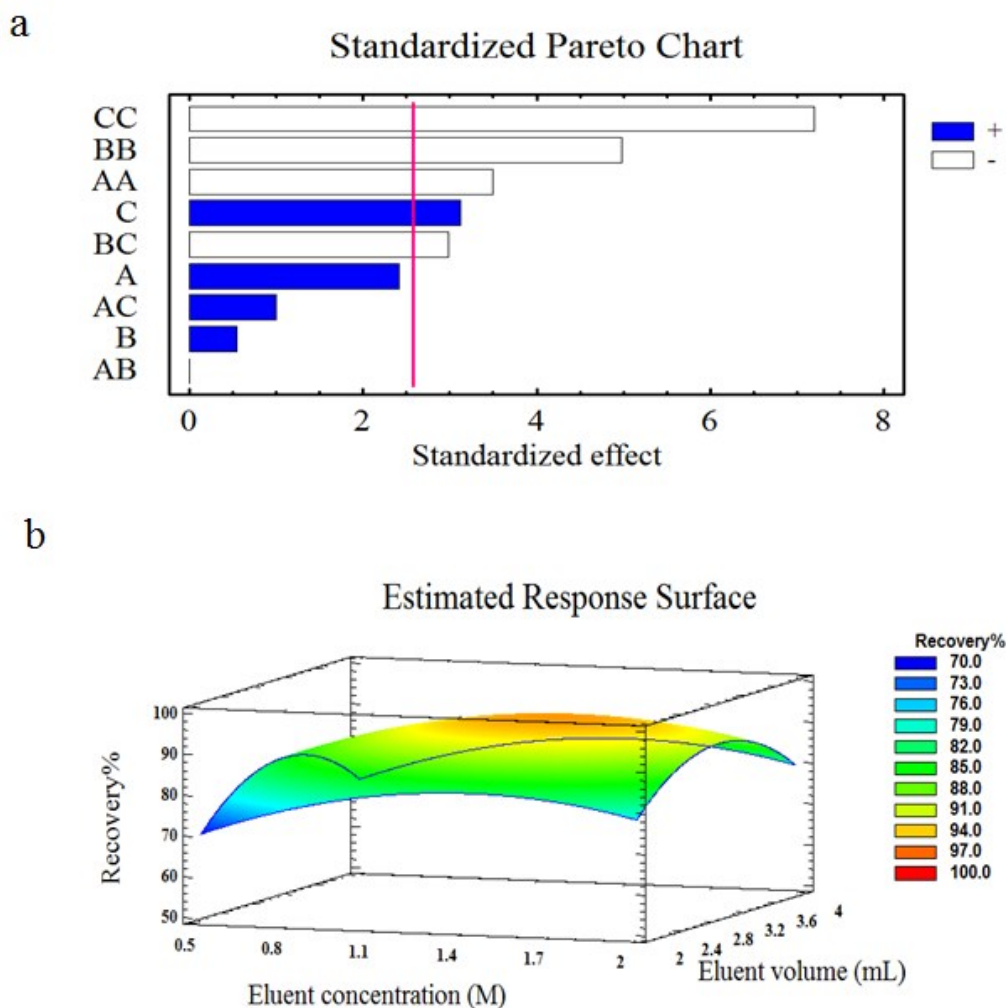

**Fig. 2S:** (a) Pareto chart of the main effects in the BBD. AA, BB and CC are the quadratic effects of eluent concentration, elution volume and elution time, respectively. AB, AC and BC are the interaction effects between eluent concentration and elution volume; eluent concentration and elution time and elution volume and elution time, respectively. (b) The estimated response surface of eluent concentration and elution volume.

**Table 1S**

The tolerance limit of potentially interfering ions in the determination of Pb(II) and Cd(II) ions.

| Interfering Ions              | Tolerable concentration ratio X/Pb(II) and Cd(II) | Recovery (%) |        |
|-------------------------------|---------------------------------------------------|--------------|--------|
|                               |                                                   | Pb(II)       | Cd(II) |
| Na <sup>+</sup>               | 10000                                             | 98 ± 2       | 99 ± 1 |
| K <sup>+</sup>                | 10000                                             | 96 ± 1       | 99 ± 2 |
| Ca <sup>2+</sup>              | 1000                                              | 97 ± 2       | 98 ± 2 |
| Mg <sup>+2</sup>              | 1000                                              | 95 ± 2       | 96 ± 1 |
| Ag <sup>+</sup>               | 200                                               | 96 ± 1       | 99 ± 1 |
| Mn <sup>2+</sup>              | 200                                               | 95 ± 1       | 95 ± 1 |
| Zn <sup>2+</sup>              | 200                                               | 97 ± 2       | 96 ± 1 |
| Ni <sup>2+</sup>              | 200                                               | 95 ± 1       | 94 ± 1 |
| Co <sup>2+</sup>              | 150                                               | 97 ± 2       | 96 ± 2 |
| Hg <sup>2+</sup>              | 130                                               | 95 ± 2       | 96 ± 1 |
| Fe <sup>3+</sup>              | 130                                               | 95 ± 2       | 96 ± 2 |
| Cr <sup>3+</sup>              | 130                                               | 96 ± 1       | 95 ± 1 |
| CO <sub>3</sub> <sup>2-</sup> | 2000                                              | 98 ± 2       | 99 ± 2 |
| NO <sub>3</sub> <sup>-</sup>  | 2000                                              | 99 ± 2       | 98 ± 2 |
